# Supplementary material for: Synthesis of Trichodermin Derivatives and Their Antimicrobial and Cytotoxic Activities
Source: PubMed Central journal article supplement (PMC6833013; doi:10.3390/molecules24203811), 2019-10-22
Supplement: molecules-24-03811-s001.pdf [file molecules-24-03811-s001.pdf]

# Synthesis of Trichodermin Derivatives and Their Antimicrobial and Cytotoxic Activities.

Javier E. Barúa <sup>1,2</sup> Mercedes de la Cruz <sup>3</sup>, Nuria de Pedro <sup>3</sup>, Bastien Cautain <sup>3</sup>, Rosa Hermosa <sup>4</sup>, Rosa E. Cardoza <sup>5</sup>, Santiago Gutiérrez <sup>5</sup>, Enrique Monte <sup>4</sup>, Francisca Vicente <sup>3</sup>, and Isidro G. Collado <sup>2,\*</sup>

<sup>1</sup> National University of Asunción, Biological Chemistry Department, Chemistry Science Faculty, Ruta Mcal. Estigarribia Km 11.5, San Lorenzo, 2160, Paraguay; [javierbarua@qui.una.py](mailto:javierbarua@qui.una.py)

<sup>2</sup> University of Cádiz, Campus of Puerto Real, Science Faculty, Department of Organic Chemistry, 11510, Puerto Real, Cádiz, Spain

<sup>3</sup> Fundación Medina, Avda. del Conocimiento 34, 18016 Armilla, Granada, Spain; [mercedes.delacruz@medinaandalucia.es](mailto:mercedes.delacruz@medinaandalucia.es) (M.d.l.C.); [nuri\\_dp@hotmail.es](mailto:nuri_dp@hotmail.es) (N.d.P.); [bastien.cautain@medinaandalucia.es](mailto:bastien.cautain@medinaandalucia.es) (B.C.); [francisca.vicente@medinaandalucia.es](mailto:francisca.vicente@medinaandalucia.es) (F.V.)

<sup>4</sup> Spanish-Portuguese Institute for Agricultural Research (CIALE), Department of Microbiology and Genetics, University of Salamanca, Campus of Villamayor, Rio Duero 12, 37185 Salamanca, Spain; [rhp@usal.es](mailto:rhp@usal.es) (R.H.); [emv@usal.es](mailto:emv@usal.es) (E.M.)

<sup>5</sup> University of León, Campus of Ponferrada, Superior and Technical University School of Agricultural Engineers. Area of Microbiology, Avda. Astorga s/n, 24400 Ponferrada, Spain; [re.cardoza@unileon.es](mailto:re.cardoza@unileon.es) (R.E.C.); [s.gutierrez@unileon.es](mailto:s.gutierrez@unileon.es) (S.G.)

\* Correspondence: [isidro.gonzalez@uca.es](mailto:isidro.gonzalez@uca.es); Tel.: +34 956 012768

## Table of contents:

**Part A:** General conditions for the preparation of compounds 7–15.....S2

**Part B:** Antimicrobial and cytotoxic activities of compounds 1–16.....S3–S4

**Part C:** <sup>1</sup>H and <sup>13</sup>C-NMR spectra for compounds 3–16.....S5–S18

### PART A : PREPARATION OF COMPOUNDS 7–15

**Table S1.** Reaction condition data for preparation of 7–15.

| Entry | acyl halide<br>(mmol)                                                                       | Trichodermol<br>(mmol) | Pyridine<br>( $\mu$ L) | CH <sub>2</sub> Cl <sub>2</sub><br>(mL) | time<br>(h) | yield<br>(%) |
|-------|---------------------------------------------------------------------------------------------|------------------------|------------------------|-----------------------------------------|-------------|--------------|
| 7     | <br>0.14   | 0.04                   | 100                    | 4                                       | 15          | 85           |
| 8     | <br>0.1    | 0.04                   | 100                    | 2                                       | 2           | 44.5         |
| 9     | <br>0.2    | 0.08                   | 200                    | 4                                       | 2           | 91.7         |
| 10    | <br>0.2   | 0.08                   | 200                    | 4                                       | 2           | 91.9         |
| 11    | <br>0.2  | 0.08                   | 200                    | 4                                       | 2           | 81.8         |
| 12    | <br>0.24 | 0.08                   | 200                    | 3                                       | 1           | 47.7         |
| 13    | <br>0.1  | 0.04                   | 100                    | 2                                       | 2           | 62           |
| 14    | <br>0.2  | 0.08                   | 200                    | 4                                       | 2           | 56.3         |
| 15    | <br>0.2  | 0.08                   | 200                    | 4                                       | 2           | 94           |

## PART B: BIOLOGICAL ACTIVITIES

**Table S2.** Antimicrobial activity of compounds 1-16. The results are expressed as MIC in µg/mL.

| Entry | <i>A. baumannii</i><br>MB5973 | <i>E.coli</i><br>MB2884 | <i>E.coli</i><br>MB5746 | <i>P. aeruginosa</i><br>MB5919 | <i>S. aureus</i><br>EPI167 | MRSA<br>5393 | <i>C. albicans</i><br>MY1055 | <i>B. subtilis</i><br>MB964 |
|-------|-------------------------------|-------------------------|-------------------------|--------------------------------|----------------------------|--------------|------------------------------|-----------------------------|
| 1     | >64                           | >64                     | >64                     | >64                            | >64                        | >64          | <4                           | no halo                     |
| 2     | >64                           | >64                     | >64                     | >64                            | >64                        | >64          | 8-16                         | no halo                     |
| 3     | >64                           | >64                     | >64                     | >64                            | >64                        | >64          | >64                          | no halo                     |
| 4     | >64                           | >64                     | >64                     | >64                            | >64                        | >64          | >64                          | no halo                     |
| 5     | >64                           | >64                     | >64                     | >64                            | >64                        | >64          | >64                          | no halo                     |
| 6     | >64                           | >64                     | >64                     | >64                            | >64                        | >64          | >64                          | no halo                     |
| 7     | >64                           | >64                     | >64                     | >64                            | >64                        | >64          | 16-32                        | no halo                     |
| 8     | >64                           | >64                     | nd                      | >64                            | >64                        | nd           | nd                           | nd                          |
| 9     | >64                           | >64                     | 64                      | >64                            | >64                        | >64          | 4-8                          | no halo                     |
| 10    | >64                           | >64                     | 32                      | >64                            | >64                        | >64          | 8                            | no halo                     |
| 11    | >64                           | >64                     | 32                      | >64                            | >64                        | >64          | >64                          | no halo                     |
| 12    | >64                           | >64                     | >64                     | >64                            | >64                        | >64          | 4                            | no halo                     |
| 13    | >64                           | >64                     | >64                     | >64                            | >64                        | >64          | 4                            | no halo                     |
| 14    | >64                           | >64                     | >64                     | >64                            | >64                        | >64          | 8-16                         | no halo                     |
| 15    | >64                           | >64                     | >64                     | >64                            | >64                        | >64          | 8                            | no halo                     |
| 16    | >64                           | >64                     | >64                     | >64                            | >64                        | >64          | >64                          | no halo                     |

Nd = no data; MRSA= Methicillin-resistant *S. aureus*; MIC= minimal inhibitory concentration

**Table S3.** Cytotoxicity of compounds **1-16** in different human cell lines, measured at 24 hours of incubation. IC<sub>50</sub> (µg/mL).

| Entry     | <i>A549</i> | <i>HepG2</i> | <i>HT29</i> | <i>MCF-7</i> | <i>RCC4-VA</i> | <i>RCC4-VHL</i> | <i>Fa2N4</i> |
|-----------|-------------|--------------|-------------|--------------|----------------|-----------------|--------------|
| <b>1</b>  | >20         | >20          | >20         | <1.25        | 14.19          | >20             | 12.09        |
| <b>2</b>  | >20         | >20          | >20         | 4.42         | >20            | >20             | >20          |
| <b>3</b>  | >20         | >20          | >20         | >20          | >20            | >20             | >20          |
| <b>5</b>  | >20         | >20          | >20         | >20          | >20            | >20             | >20          |
| <b>6</b>  | >20         | >20          | >20         | >20          | >20            | >20             | >20          |
| <b>7</b>  | >20         | >20          | >20         | 13.52        | >20            | >20             | >20          |
| <b>9</b>  | >20         | >20          | >20         | 1.93         | >20            | >20             | >20          |
| <b>10</b> | >20         | 14.20        | >20         | 3.59         | >20            | >20             | >20          |
| <b>11</b> | >20         | >20          | >20         | 11.26        | >20            | >20             | >20          |
| <b>12</b> | >20         | >20          | >20         | 3.78         | 6.02           | 8.00            | >20          |
| <b>13</b> | >20         | 17.48        | >20         | 2.15         | >20            | >20             | >20          |
| <b>14</b> | >20         | >20          | >20         | 5.22         | >20            | >20             | >20          |
| <b>15</b> | >20         | >20          | >20         | 2.03         | 17.14          | >20             | >20          |
| <b>16</b> | >20         | >20          | >20         | >20          | >20            | >20             | >20          |

A549 = adenocarcinomic alveolar basal epithelial cells (CCL-185); HepG2= liver hepatocellular (CCL-8065); HT29= colorectal adenocarcinoma (HTB-38); MCF-7= breast carcinoma (HTB-22); RCC4-VA and RCC4-VHL = renal carcinoma; Fa2N4= immortalized human hepatocytes

**PART C: <sup>1</sup>H AND <sup>13</sup>C-NMR SPECTRA**

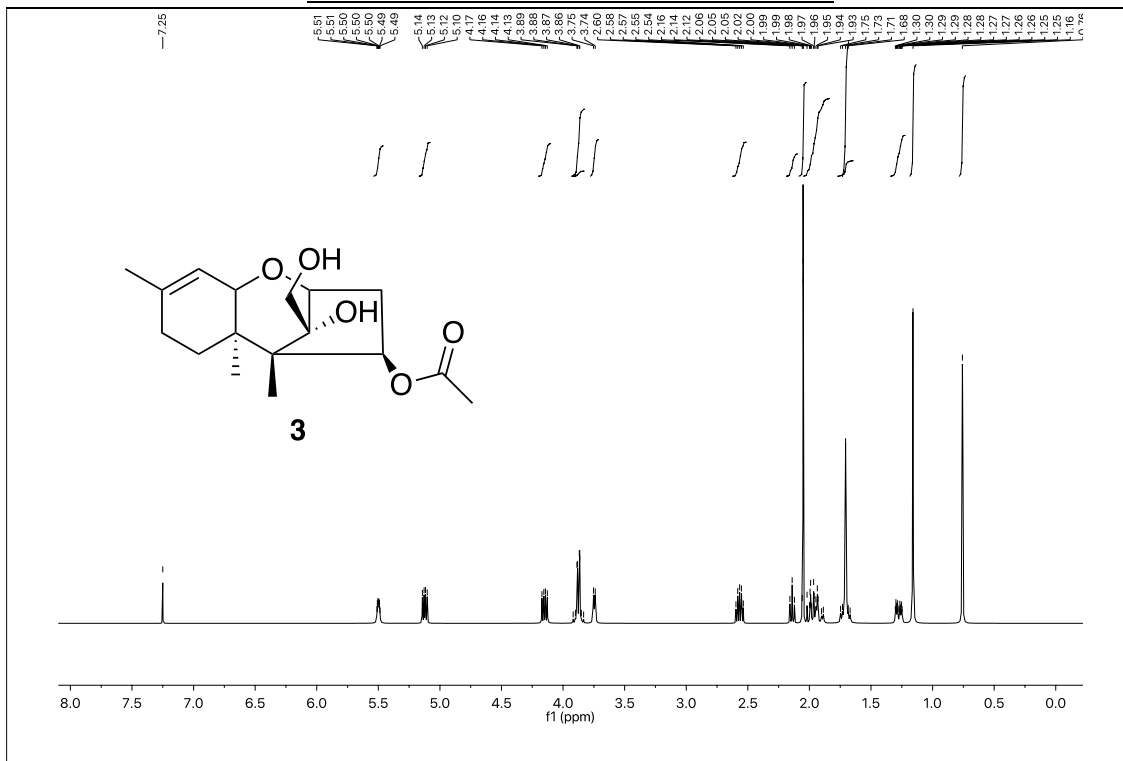

400 MHz <sup>1</sup>H NMR of compound 3 in CDCl<sub>3</sub>

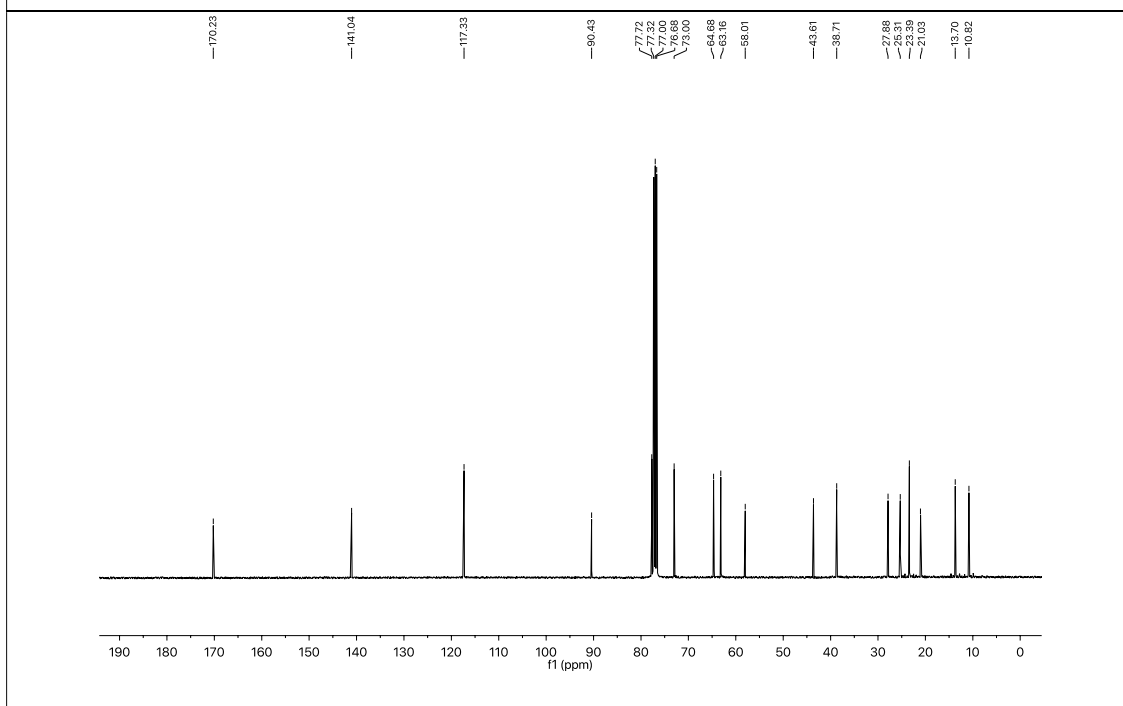

100 MHz <sup>13</sup>C NMR of compound 3 in CDCl<sub>3</sub>

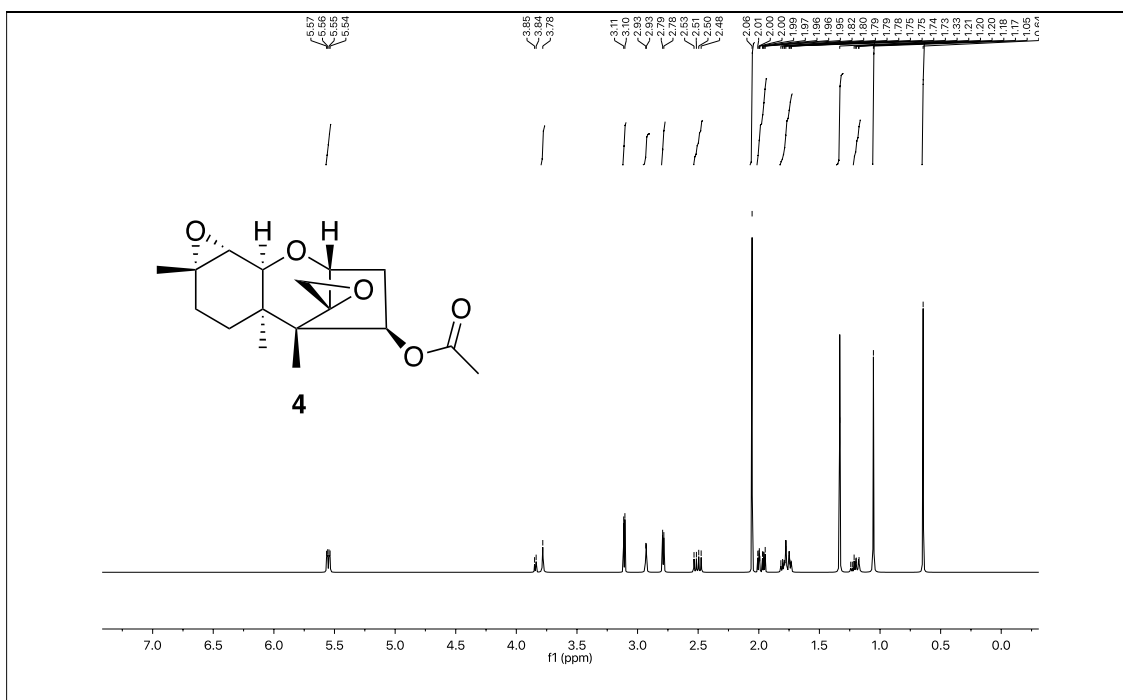

400 MHz  $^1\text{H}$  NMR of compound **4** in  $\text{CDCl}_3$

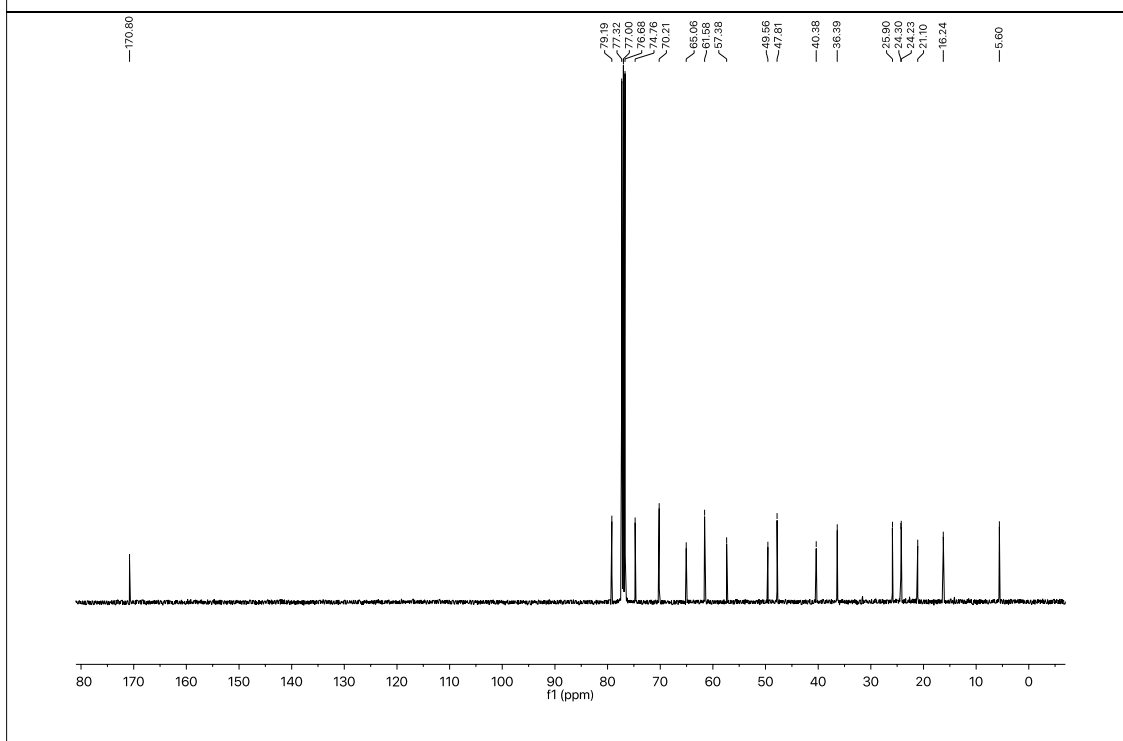

100 MHz  $^{13}\text{C}$  NMR of compound **4** in  $\text{CDCl}_3$

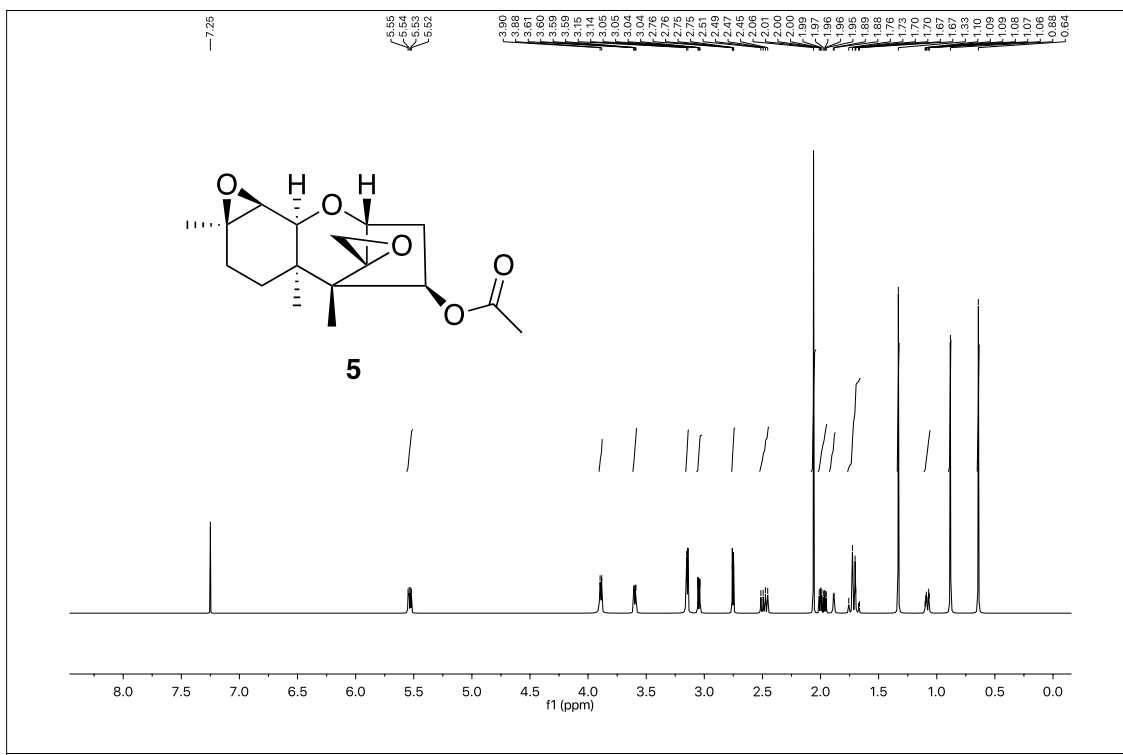

400 MHz  $^1\text{H}$  NMR of compound 5 in  $\text{CDCl}_3$

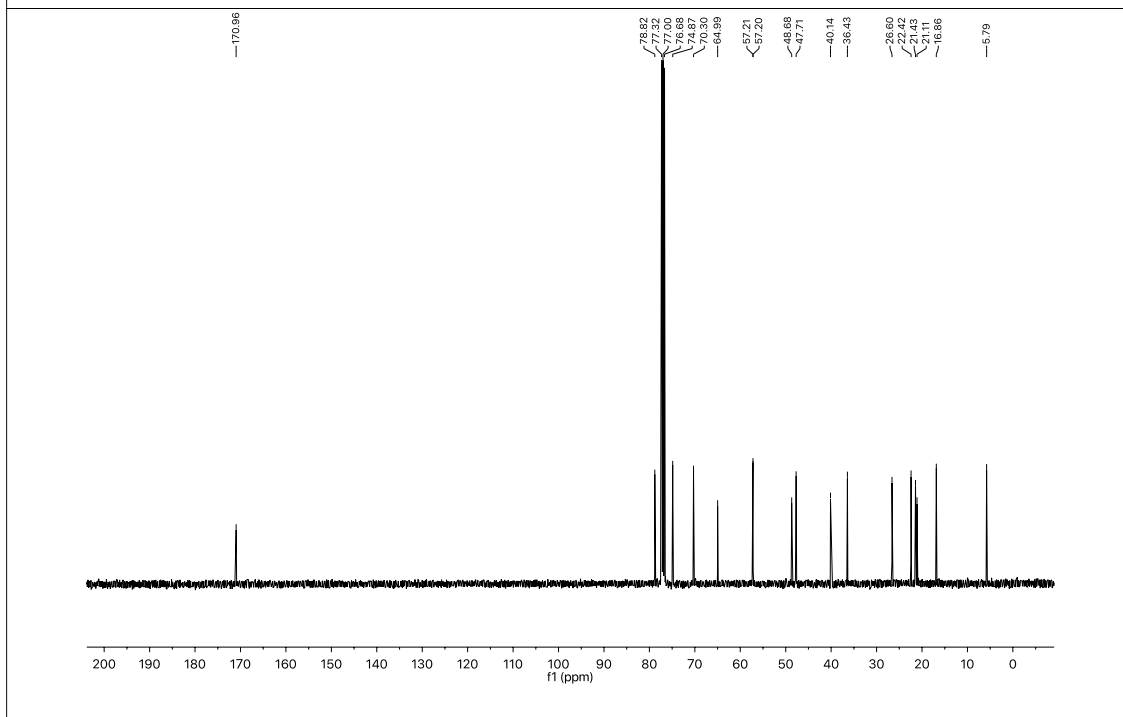

100 MHz  $^{13}\text{C}$  NMR of compound 5 in  $\text{CDCl}_3$

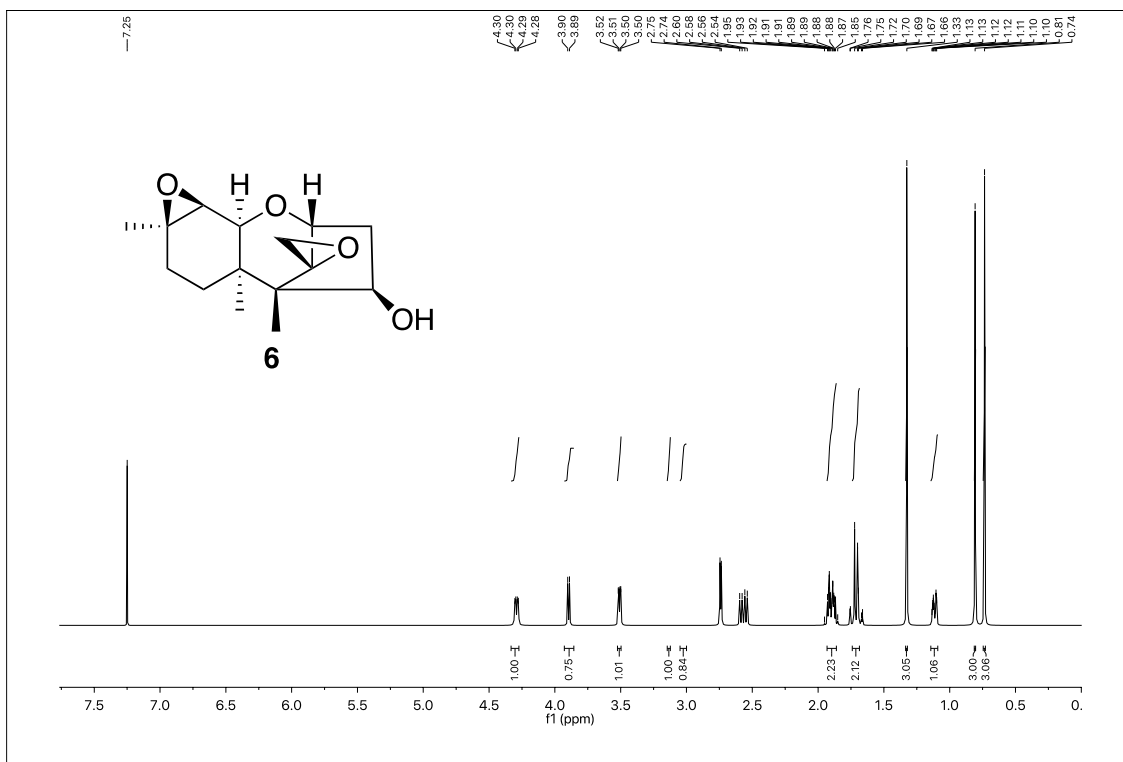

400 MHz <sup>1</sup>H NMR of compound 6 in CDCl<sub>3</sub>

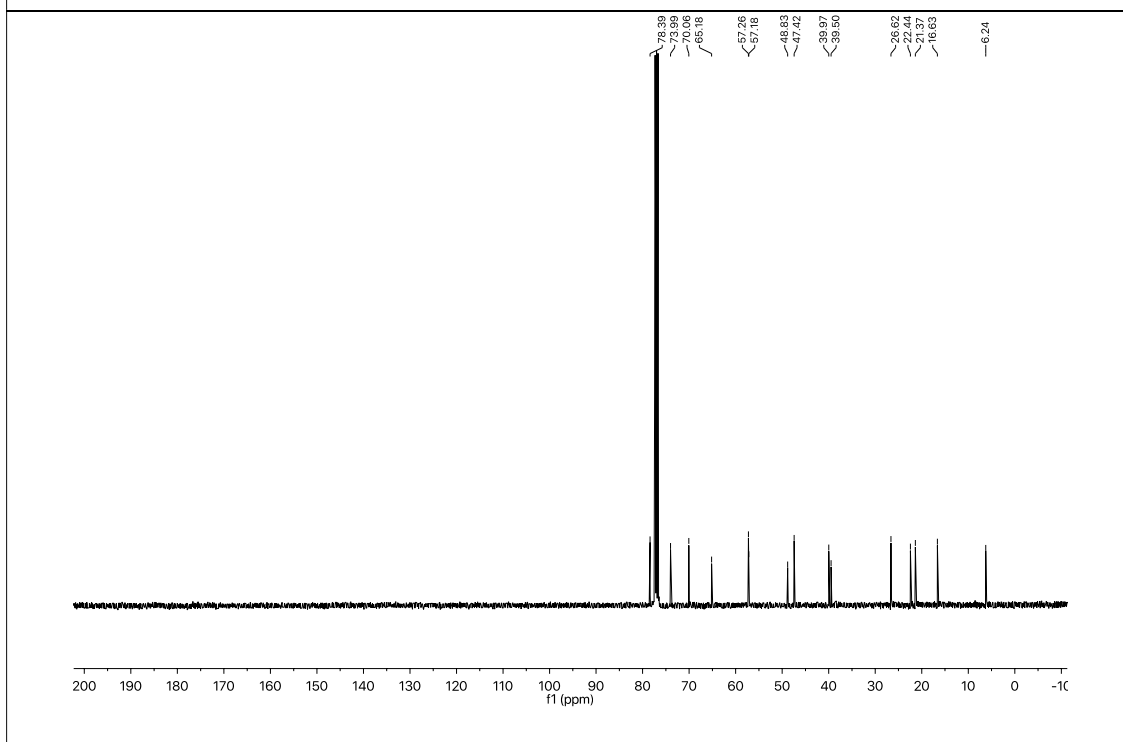

100 MHz <sup>13</sup>C NMR of compound 6 in CDCl<sub>3</sub>



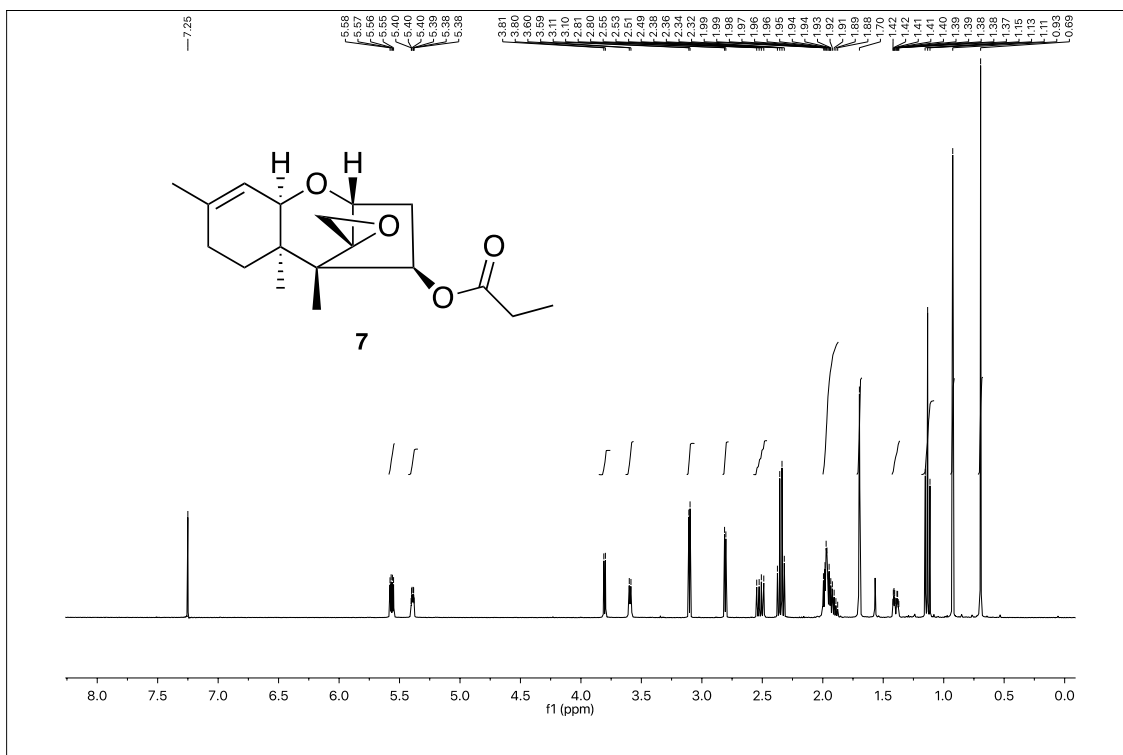

400 MHz  $^1\text{H}$  NMR of compound 7 in  $\text{CDCl}_3$

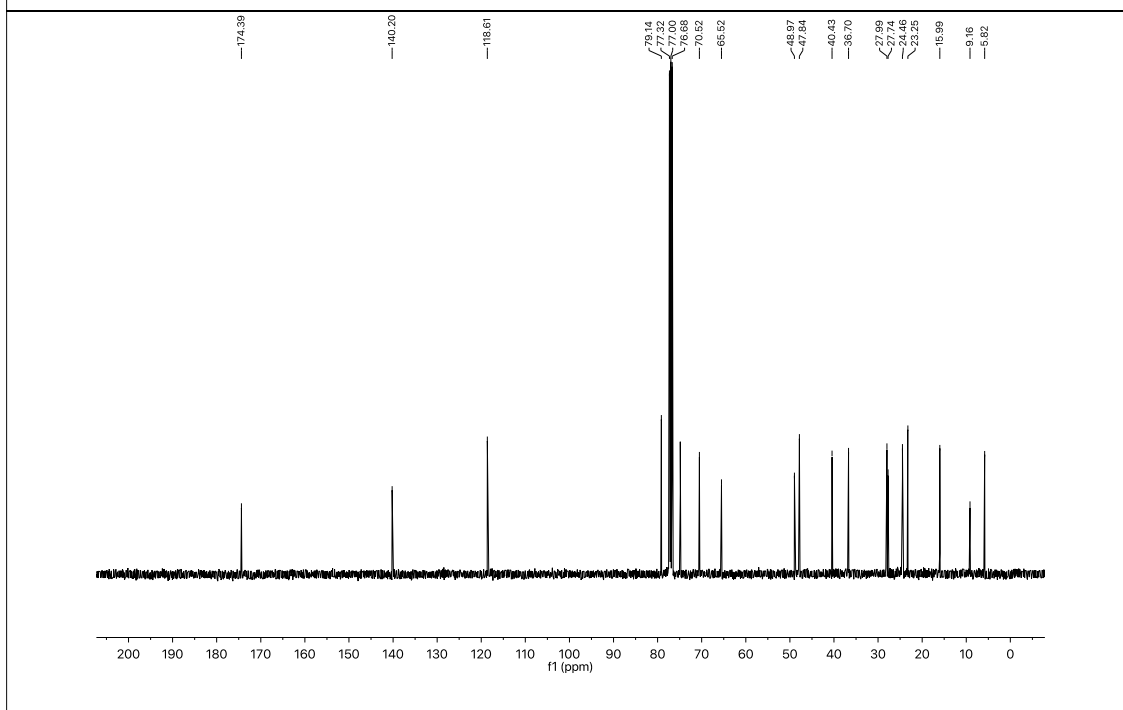

100 MHz  $^{13}\text{C}$  NMR of compound 7 in  $\text{CDCl}_3$



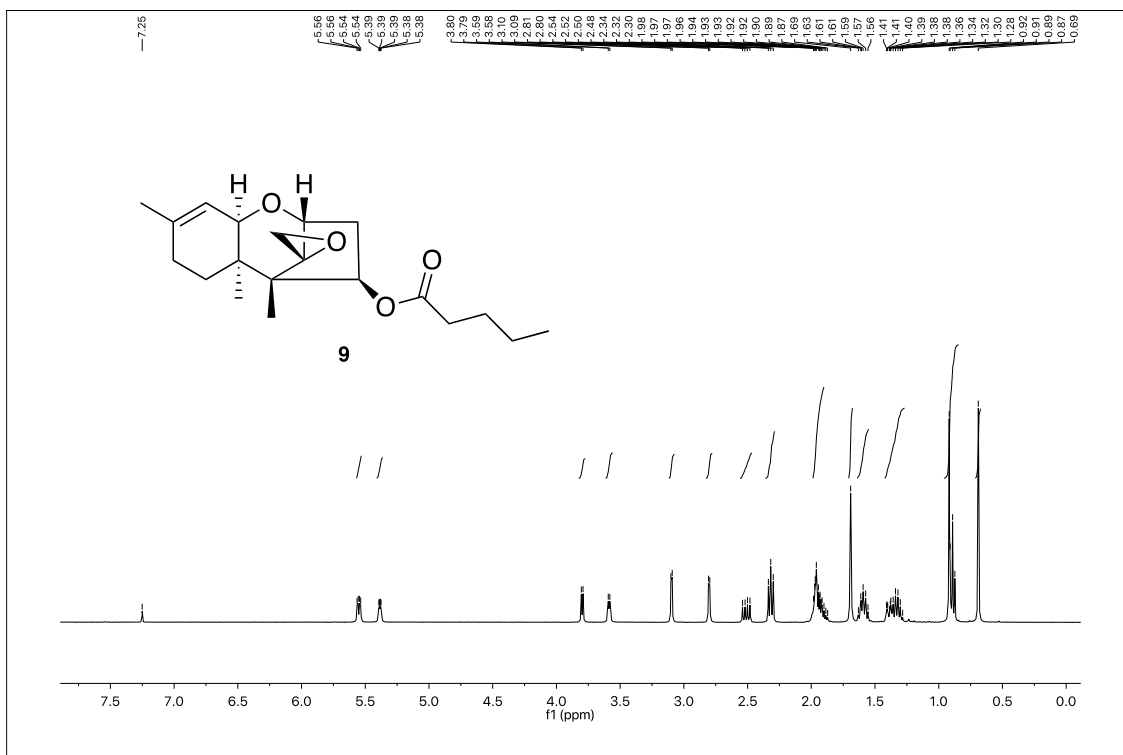

400 MHz  $^1\text{H}$  NMR of compound **9** in  $\text{CDCl}_3$

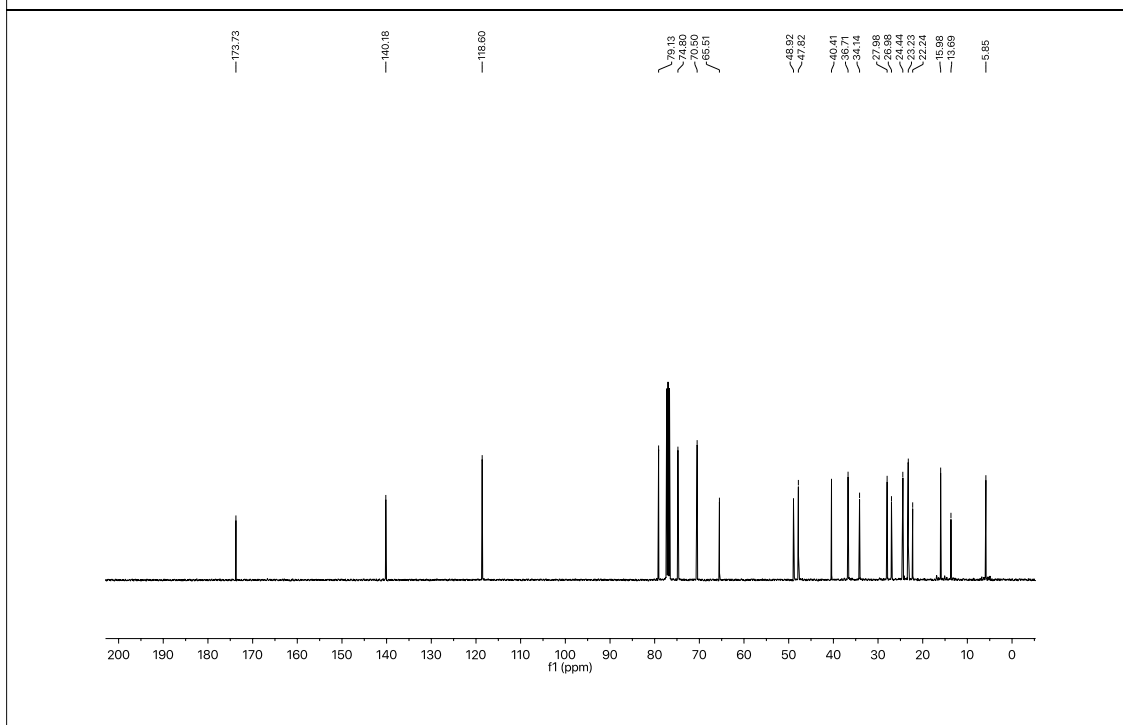

100 MHz  $^{13}\text{C}$  NMR of compound **9** in  $\text{CDCl}_3$



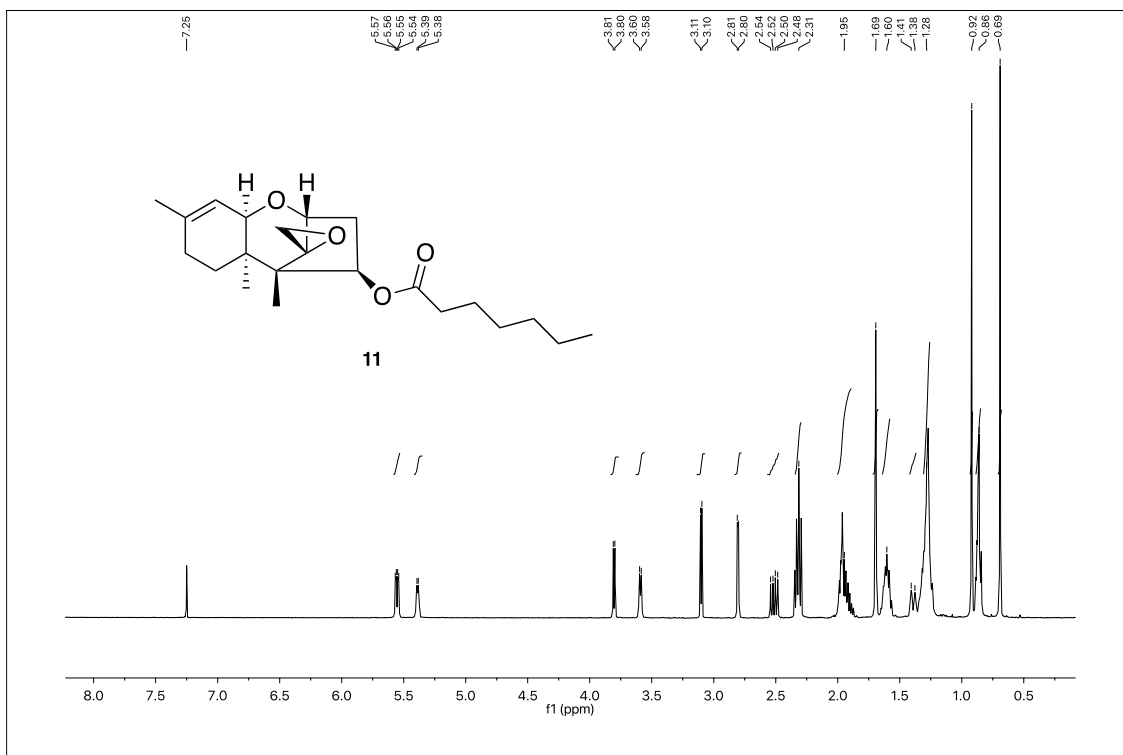

400 MHz  $^1\text{H}$  NMR of compound **11** in  $\text{CDCl}_3$

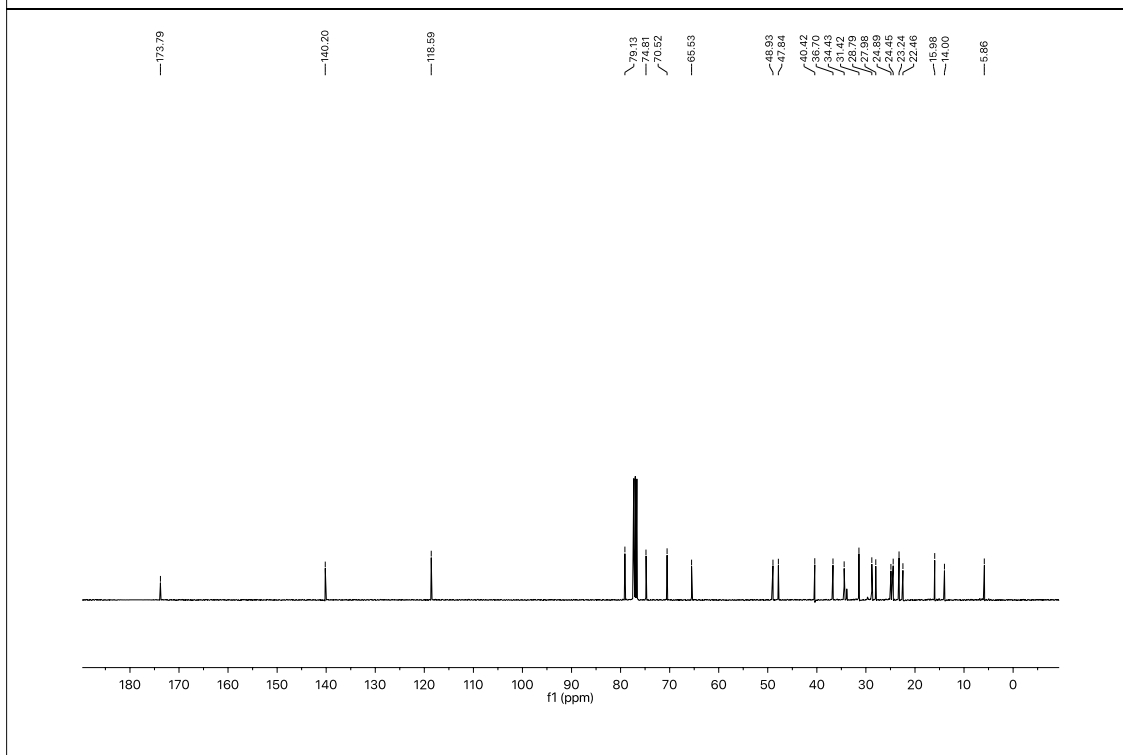

100 MHz  $^{13}\text{C}$  NMR of compound **11** in  $\text{CDCl}_3$

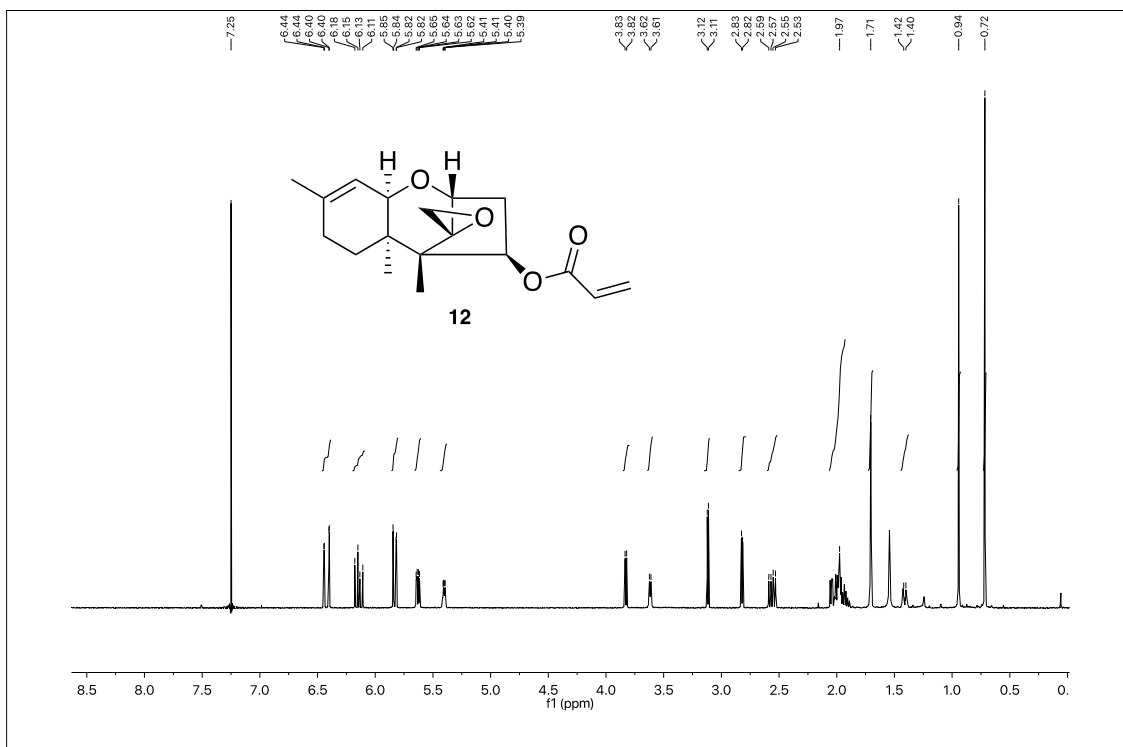

400 MHz  $^1\text{H}$  NMR of compound **12** in  $\text{CDCl}_3$

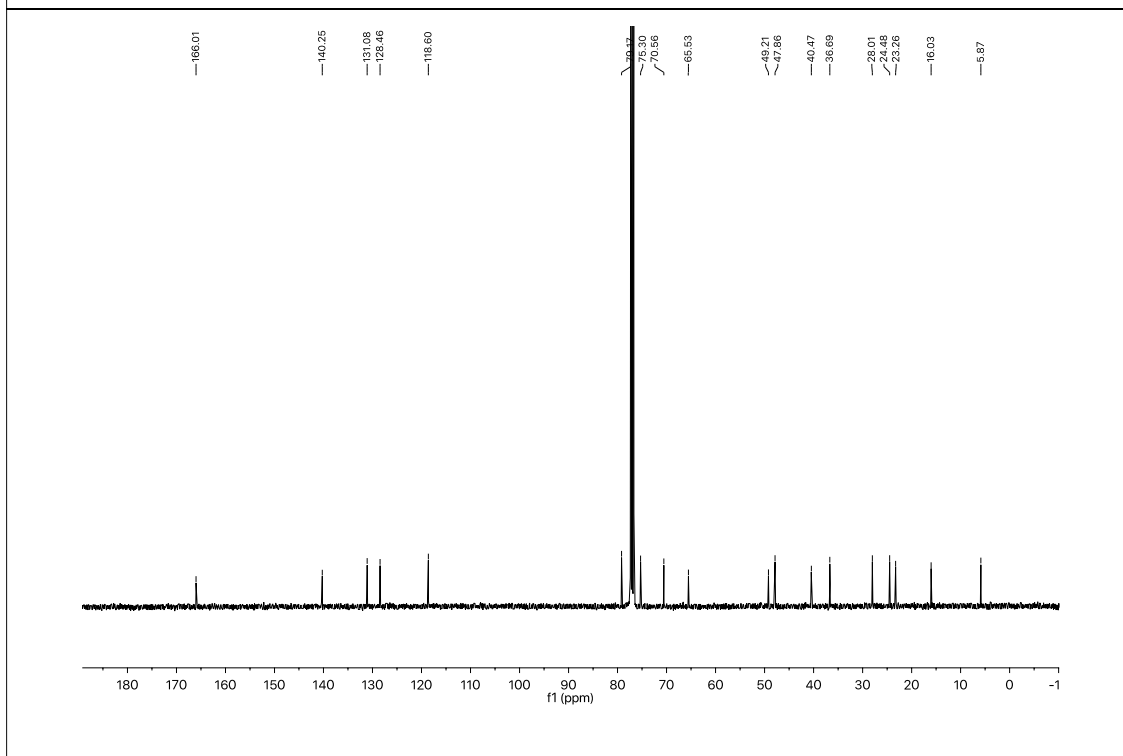

100 MHz  $^{13}\text{C}$  NMR of compound **12** in  $\text{CDCl}_3$

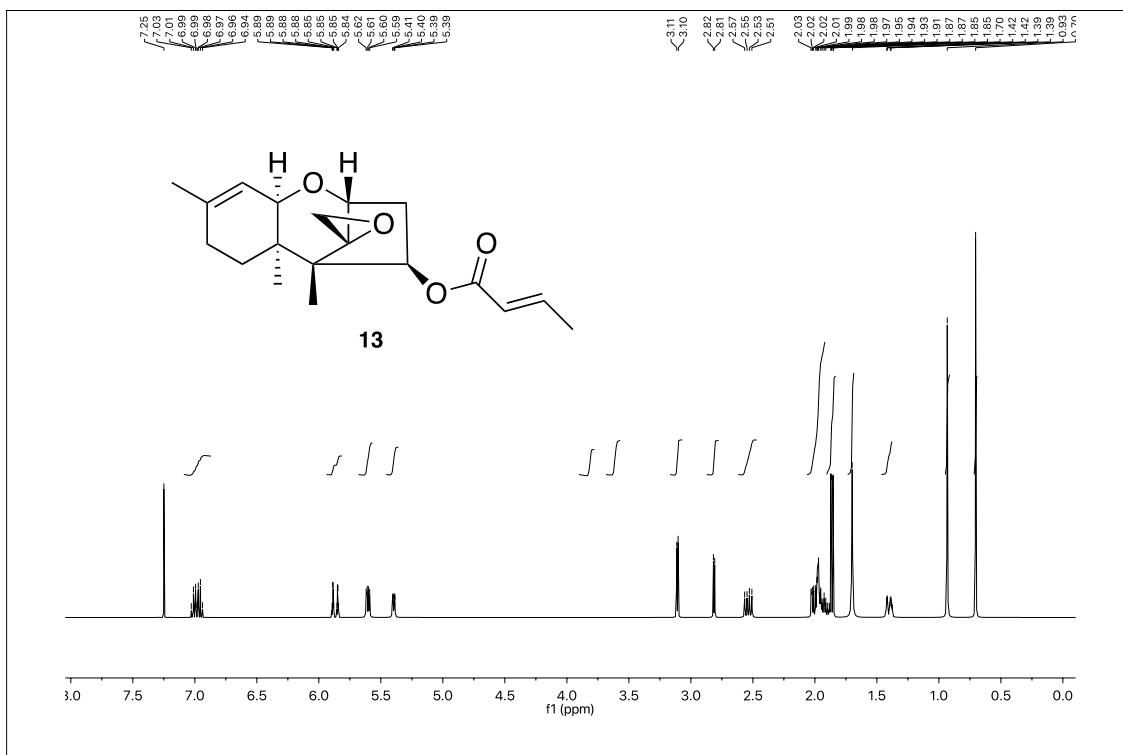

400 MHz  $^1\text{H}$  NMR of compound **13** in  $\text{CDCl}_3$

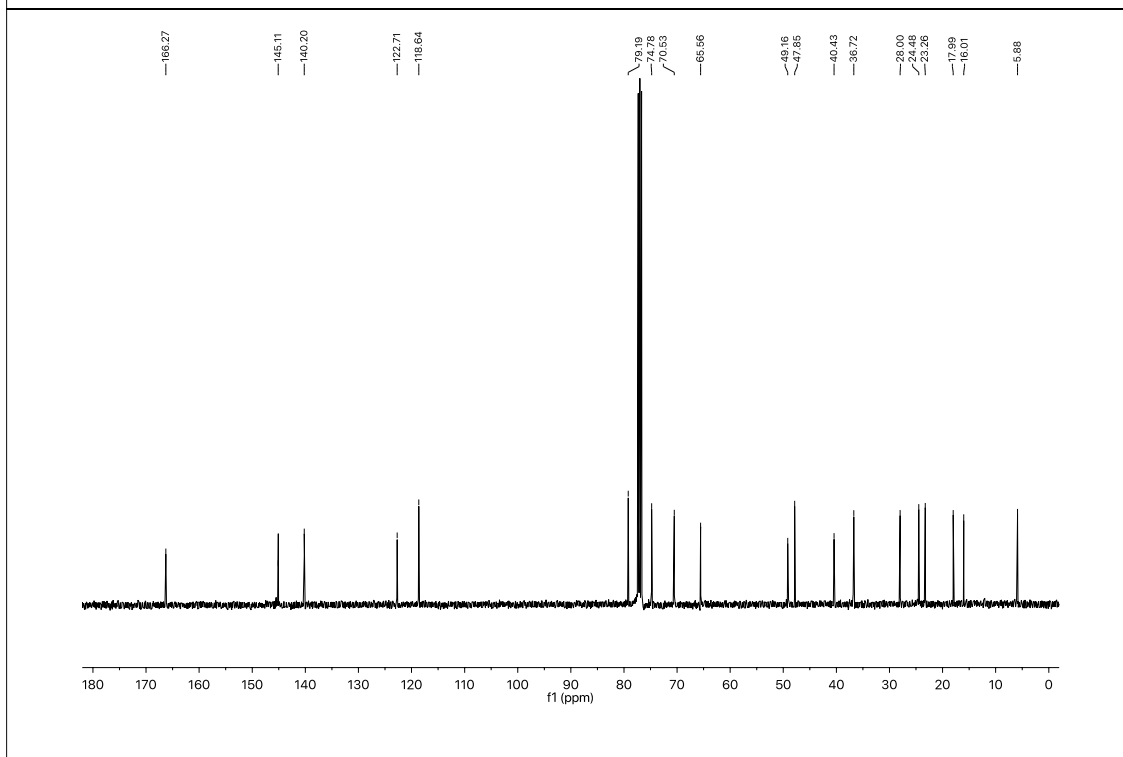

100 MHz  $^{13}\text{C}$  NMR of compound **13** in  $\text{CDCl}_3$

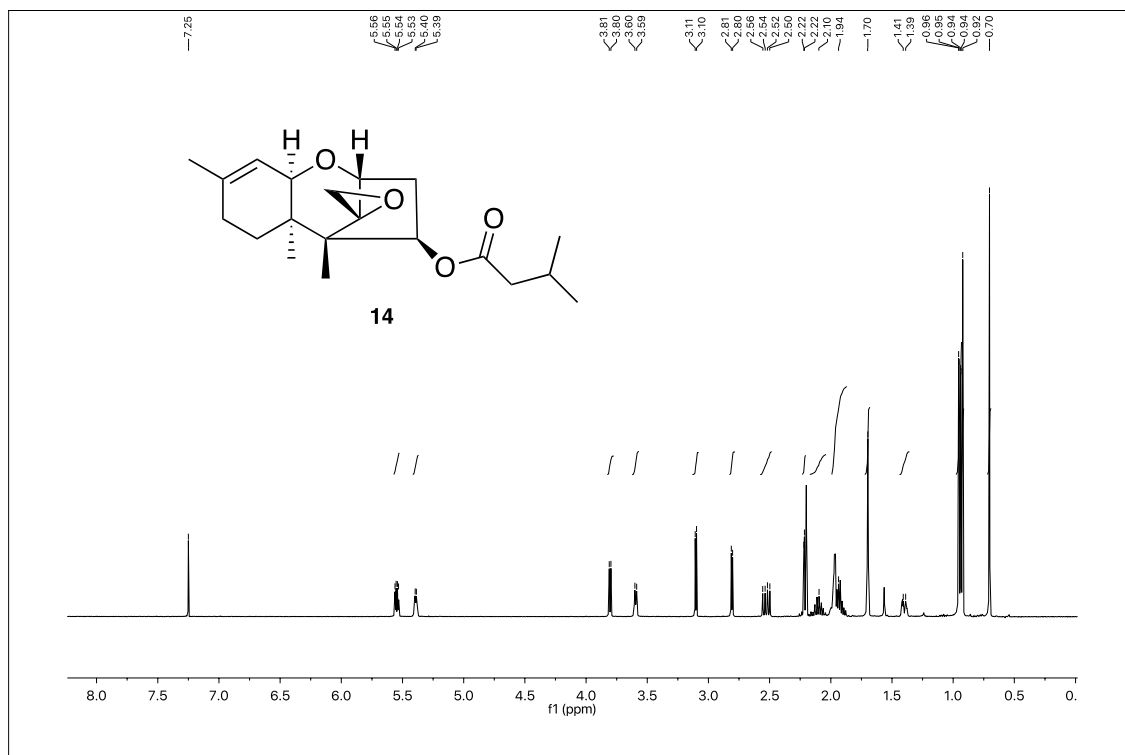

400 MHz  $^1\text{H}$  NMR of compound **14** in  $\text{CDCl}_3$

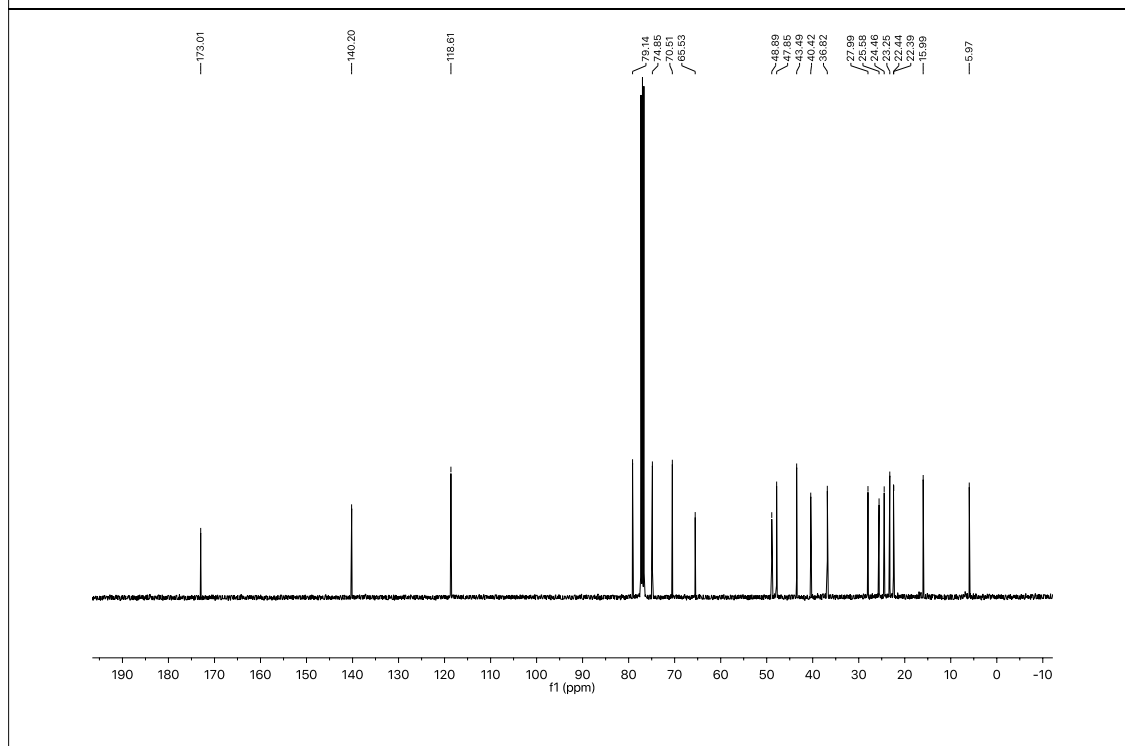

100 MHz  $^{13}\text{C}$  NMR of compound **14** in  $\text{CDCl}_3$



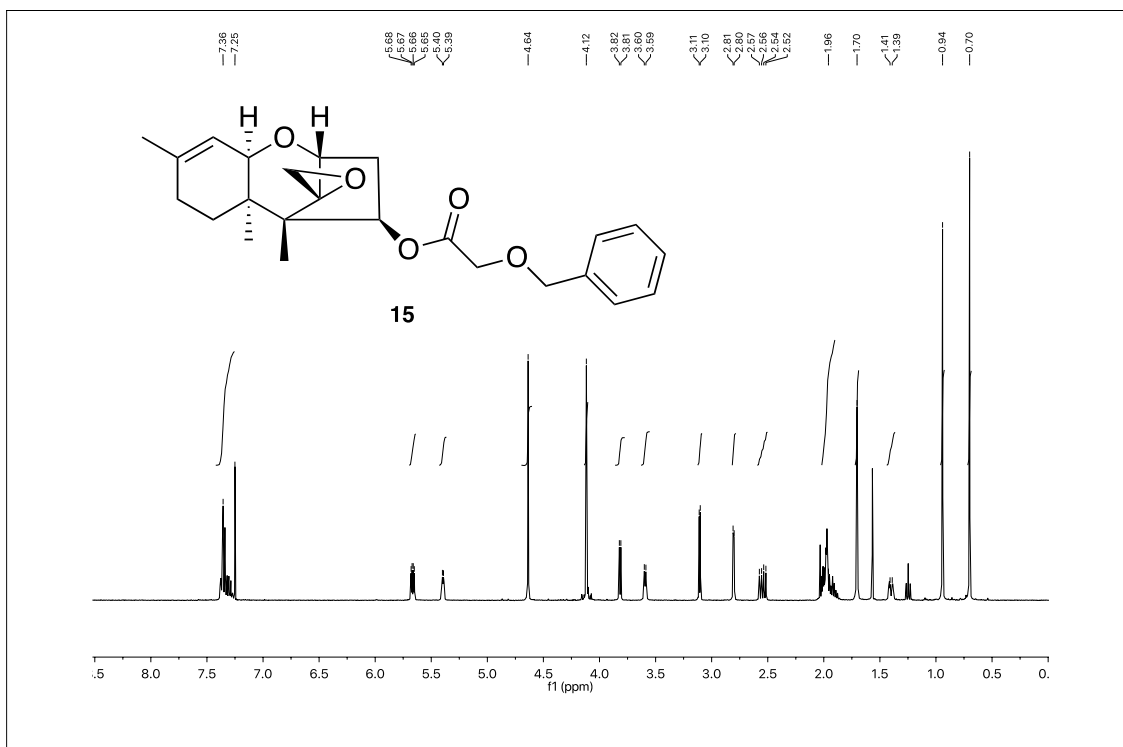

400 MHz  $^1\text{H}$  NMR of compound **15** in  $\text{CDCl}_3$

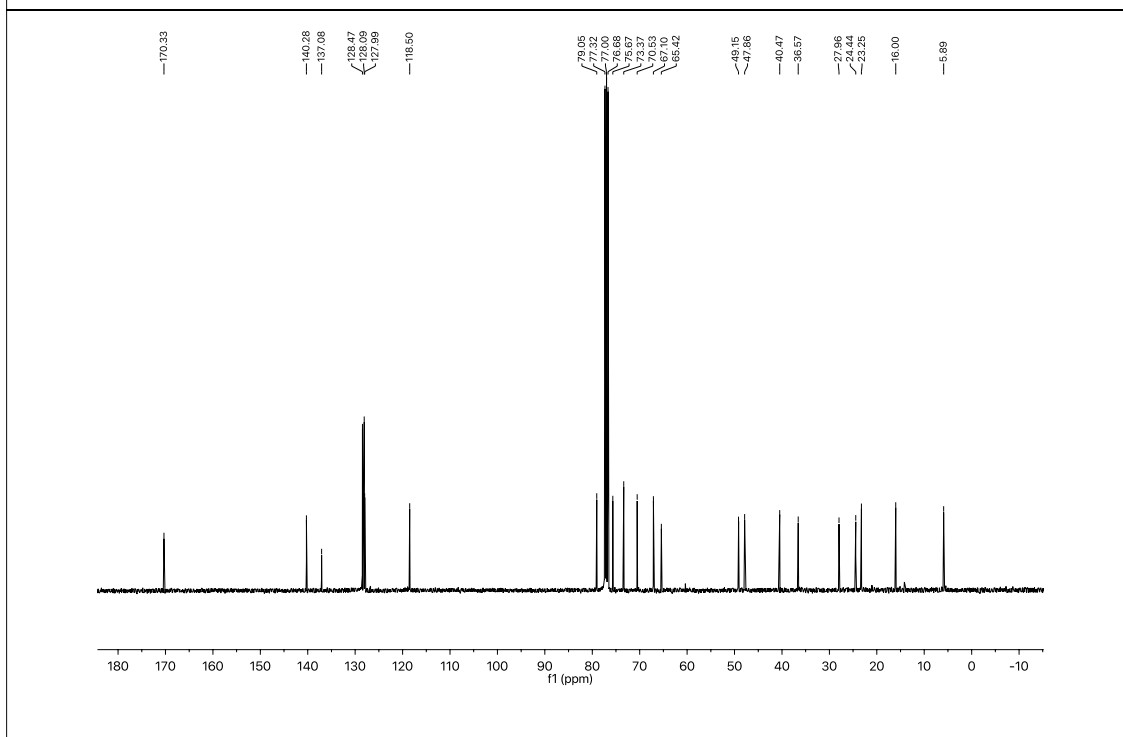

100 MHz  $^{13}\text{C}$  NMR of compound **15** in  $\text{CDCl}_3$
